# Supplementary material for: Cell-intrinsic regulation of peripheral memory-phenotype T cell frequencies
Source: PLOS journal article supplement (doi:10.1371/journal.pone.0200227), 2018-12-17

## CD4 naive (% of CD4 cells)

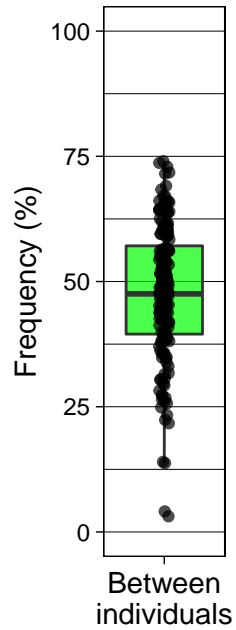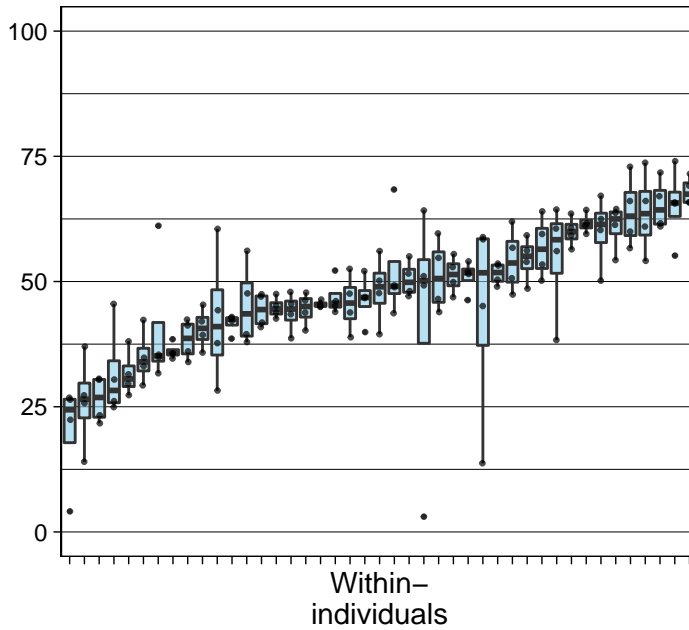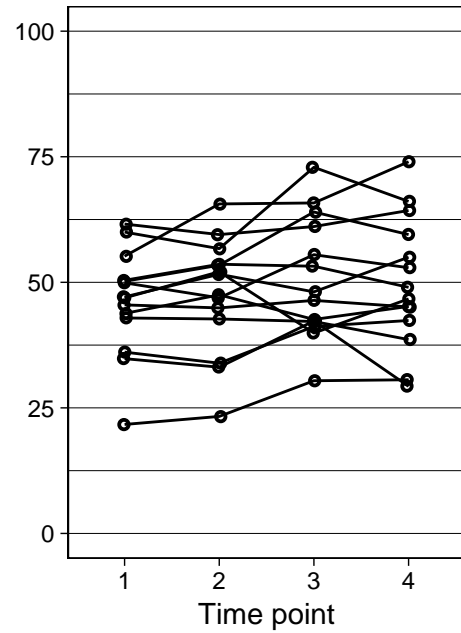

## CD4 memory (% of CD4 cells)

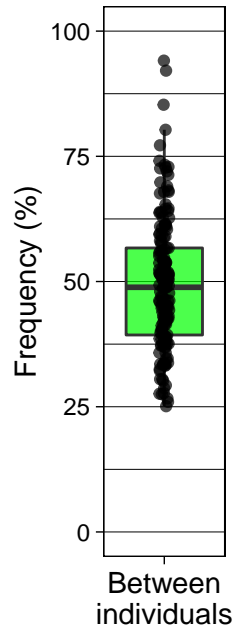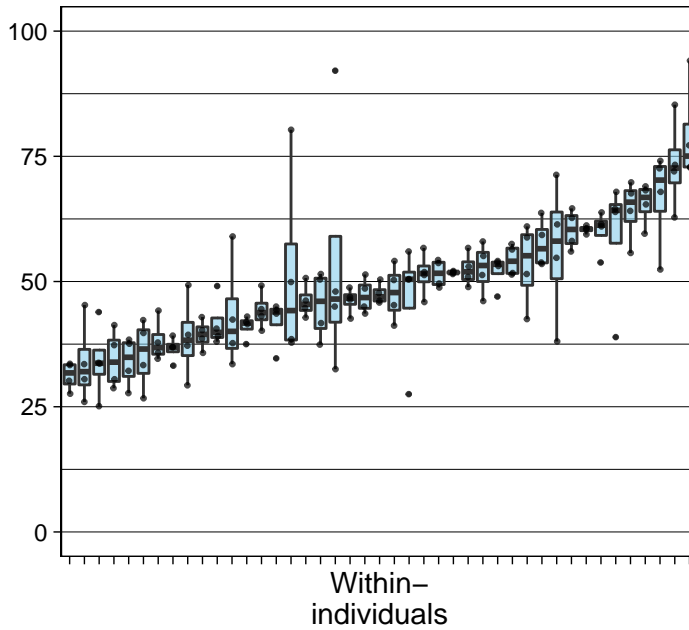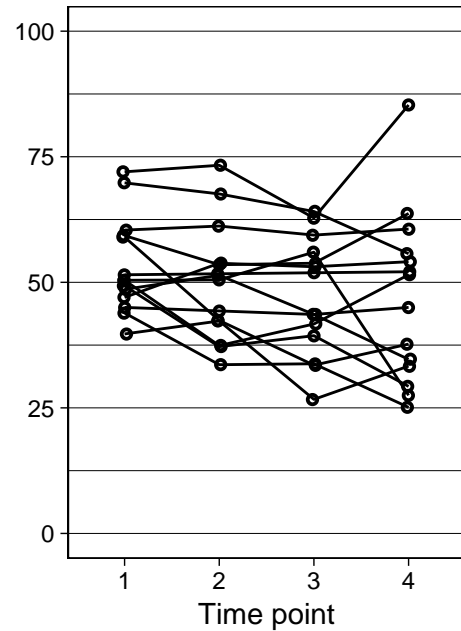

Supplement: S3 (10.1371/journal.pone.0200227.s003) [file journal.pone.0200227.s003]
