# Supplementary material for: Cell-intrinsic regulation of peripheral memory-phenotype T cell frequencies
Source: PLOS journal article supplement (doi:10.1371/journal.pone.0200227), 2018-12-17

### CD8 naive (% of CD8 cells)

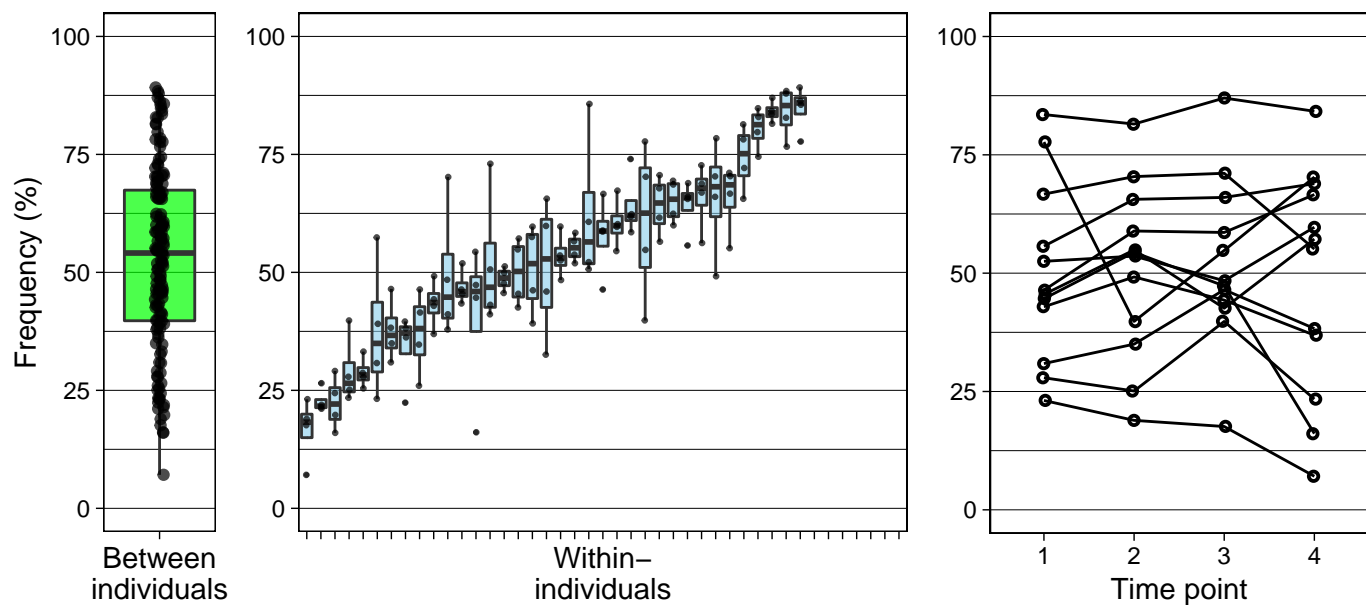

### CD8 memory (% of CD8 cells)

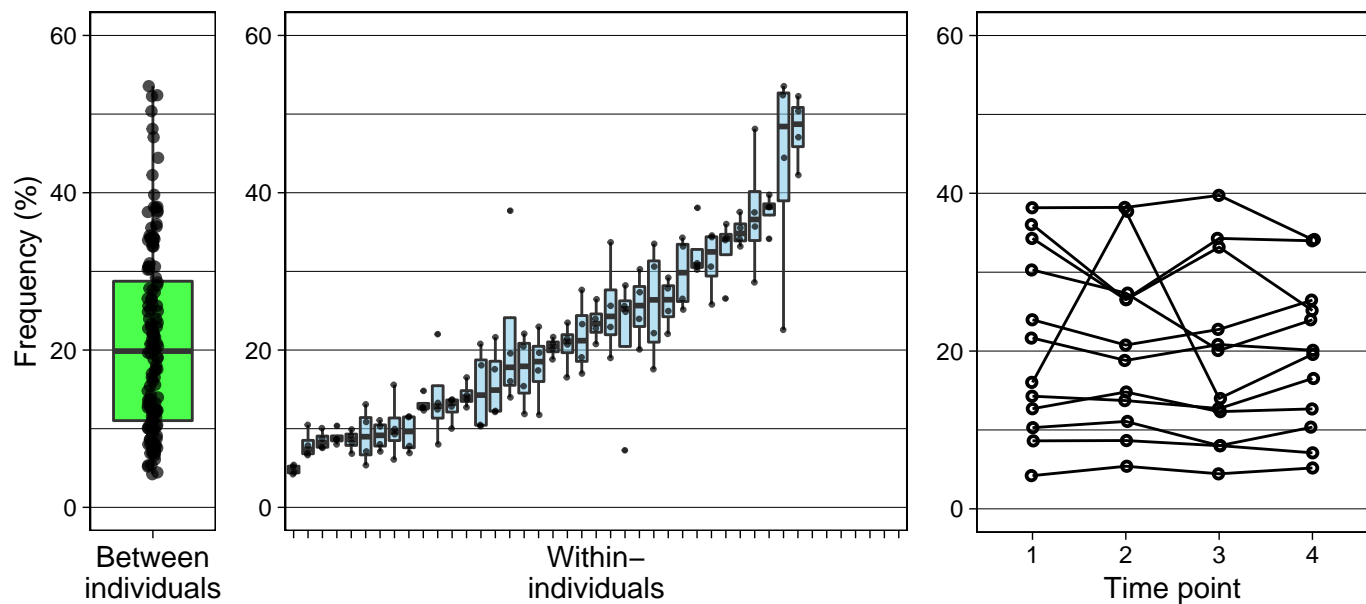

### CD8 TEMRA (% of CD8 cells)

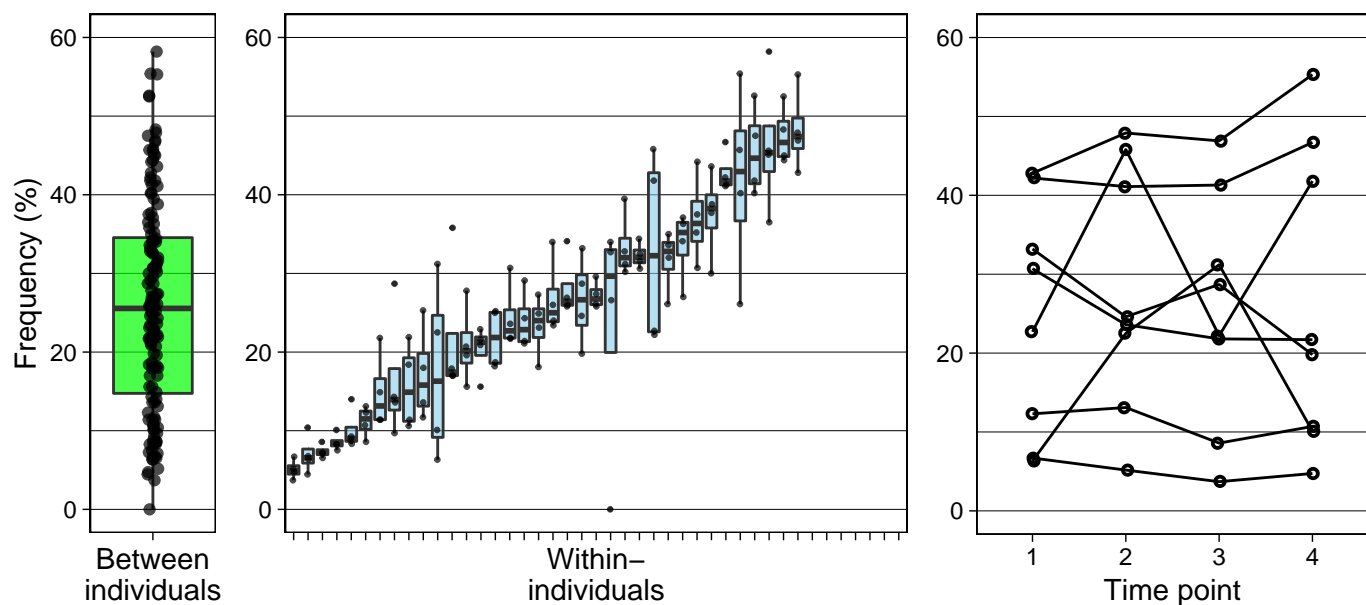

Supplement: S4 (10.1371/journal.pone.0200227.s004) [file journal.pone.0200227.s004]
