# Supplementary material for: Cell-intrinsic regulation of peripheral memory-phenotype T cell frequencies
Source: PLOS journal article supplement (doi:10.1371/journal.pone.0200227), 2018-12-17

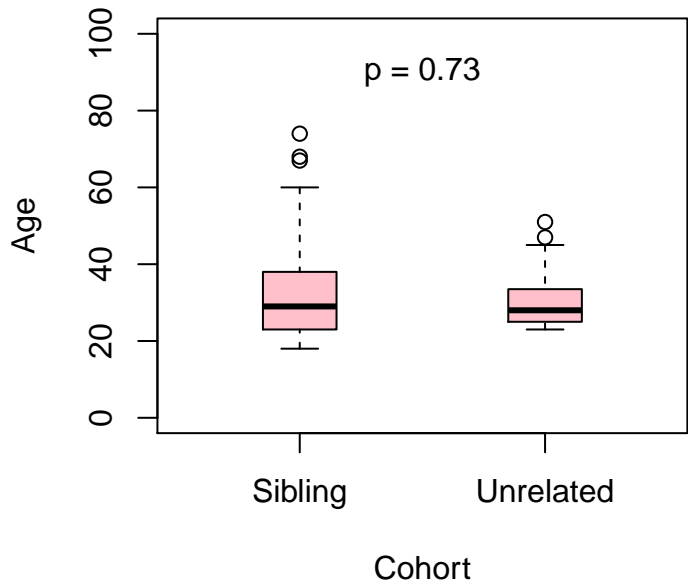

Supplement: S12 (10.1371/journal.pone.0200227.s012) [file journal.pone.0200227.s012]
